1 **The *Drosophila* DCP2 is evolutionarily conserved in sequence and structure – insights from *in silico***  
2 **studies of DmDCP2 orthologs and paralogs**

3 Rohit Kunar and Jagat Kumar Roy\*

4 Cytogenetics Laboratory, Department of Zoology, Institute of Science, Banaras Hindu University,  
5 Varanasi – 221005, Uttar Pradesh, India

6 Email ID of authors –

7 Rohit Kunar : [rohit.kunar3@bhu.ac.in](mailto:rohit.kunar3@bhu.ac.in)

8 Jagat Kumar Roy : [jkroy@bhu.ac.in](mailto:jkroy@bhu.ac.in)

9

10 **\*Address for Correspondence –**

11 Cytogenetics Laboratory,  
12 Department of Zoology,  
13 Institute of Science,  
14 Banaras Hindu University,  
15 Varanasi – 221005,  
16 Uttar Pradesh, India.  
17 Phone: +91-542-236-8145  
18 Fax: +91-542-236-8457  
19 E-mail: [jkroy@bhu.ac.in](mailto:jkroy@bhu.ac.in)

20

21 **Running title – Evolutionary conservation of *Drosophila* DCP2**

22

23 **The *Drosophila* DCP2 is evolutionarily conserved in sequence and structure – insights from *in silico***  
24 **studies of DmDCP2 orthologs and paralogs**

25 Rohit Kumar and Jagat Kumar Roy\*

26 Cytogenetics Laboratory, Department of Zoology, Institute of Science, Banaras Hindu University,  
27 Varanasi – 221005, Uttar Pradesh, India

28 **Abstract**

29 The mRNA decapping proteins (DCPs) function to hydrolyze the 7-methylguanosine cap at the 5' end of  
30 mRNAs thereby, exposing the transcript for degradation by the exonuclease(s) and hence, play a  
31 pioneering role in the mRNA decay pathway. In *Drosophila melanogaster*, the mRNA decapping protein  
32 2 (DCP2) is the only catalytically active mRNA decapping enzyme present. Despite its presence being  
33 reported across diverse species in the phylogenetic tree, a quantitative approach to the index of its  
34 conservation in terms of its sequence has not been reported so far. With structural and mechanistic  
35 insights being explored in the yeasts, the insect DCP2 has never been explored in the perspectives of  
36 structure and the indices of the conservation of its sequence and/or structure *vis-à-vis* topological facets.  
37 Being an evolutionarily conserved protein, the present endeavor aimed at deciphering the evolutionary  
38 relationship(s) and the pattern of conservation of the sequence of DCP2 across the phylogenetic tree as  
39 well as in sibling species of *D. melanogaster* through a semi-quantitative approach relying on multiple  
40 sequence alignment and analyses of percentage identity matrices. Since NUDIX proteins are functionally  
41 diverse, an attempt to identify the other NUDIX proteins (or, DCP2 paralogs) in *D. melanogaster* and  
42 compare and align their structural features with that of DCP2 through *in silico* approaches was  
43 endeavored in parallel. Our observations provide quantitative and structural bases for the observed  
44 evolutionary conservation of DCP2 across the diverse phyla and also, identify and reinforce the structural  
45 conservation of the NUDIX family in *D. melanogaster*.

46 **Introduction**

47 mRNA decapping, by virtue of its pioneering role in the degradation of transcripts plays a significant role  
48 in the turnover of mRNA and widely affects the expression of genes (Mitchell and Tollervey, 2001;  
49 Raghavan and Bohjanen, 2004; Song et al, 2010). The mRNA decapping protein 2 (DCP2) performs this  
50 essential step (Dunckley and Parker, 1999) and is conserved across diverse species (Wang et al, 2002).  
51 Previous studies (reviewed in Grudzien-Nogalska and Kiledjian, 2016; Wurm and Sprangers, 2019) have  
52 identified DCP2 to contain a Box A domain and a NUDIX motif. The Box A domain is essential to  
53 maintain the catalytic fidelity of decapping (She et al, 2008) and interacts with the activator of decapping,

54 the mRNA decapping protein 1 (DCP1) (Li and Kiledjian, 2010). Another domain, the Box B domain,  
55 which is a part of the NUDIX fold and lies just C-terminal to the NUDIX motif, is essential for binding to  
56 the RNA (She et al, 2008).

57 The NUDIX hydrolase superfamily or as commonly referred to as the homology clan (Srouji et al, 2017)  
58 encompasses approximately 80,000 proteins, which bears the 23 residue consensus sequence,  
59 GX<sub>3</sub>EX<sub>7</sub>REUXEEXGU (U: bulky hydrophobic aliphatic residue such as leucine, isoleucine or valine; X:  
60 any amino acid) and harbor a helix-loop-helix structure. The proteins are characterized by the presence of  
61 a beta-grasp domain composed of approximately 130 residues which coordinates Mg<sup>2+</sup> ions *via* three  
62 conserved Glutamate residues. Members of this superfamily, show monophyly with regard to their  
63 function and belong to four general functional classes, *viz.*, pyrophosphohydrolases, isopentenyl  
64 diphosphate isomerases (IDIs), adenine/guanine (A/G) mismatch-specific adenine glycosylases, and some  
65 proteins with non-enzymatic activities such as protein-protein interaction and/or transcriptional  
66 regulation. The largest sub-group, pyrophosphohydrolases encompass proteins with more than hundred  
67 distinct hydrolase specificities (Srouji et al., 2017).

68 During evolution, protein structures change due to mutations, which can involve substitutions or  
69 insertions or deletions. The extent of perturbations in the structures of higher order in a protein depend on  
70 the type of mutations, where, some mutations may completely disrupt the existing structure while others  
71 may affect the physic-chemical properties of the protein (and confer altered or neo-functional properties)  
72 without causing major perturbations of the structure (Illergård et al, 2009). Protein domains are the  
73 modules of protein architecture which are composed of independently folding subsequences which are  
74 found to be arranged differently in different proteins (Forslund et al, 2011). Usually, the conservation of  
75 homologous sequences is rarely homogeneous along their length, with their conservation being localized  
76 to specific regions. Characteristically, the most conserved regions in a protein are those which are  
77 important functionally and structurally (Sitbon and Pietrokovski, 2007).

78 In perspective, the *Drosophila* DCP2 is orthologous to the isoform(s) harbored by all other species in the  
79 phylogenetic tree and is paralogous to the different proteins harboring the NUDIX motif *vis-à-vis* NUDIX  
80 proteins in *Drosophila* itself (Jensen, 2001). Herein, the index of homology of the sequence of the various  
81 DCP2 orthologs and paralogs has been explored alongwith insights into the structure of *Drosophila* DCP2  
82 and its homology with the paralogous proteins.

## 83 **Materials and Methods**

### 84 **Retrieval of sequences of DCP2 orthologs and paralogs**

85 Sequences of DCP2 orthologs across the phylogenetic tree and sibling species of *Drosophila*  
86 *melanogaster* were procured from the NCBI (<http://www.ncbi.nlm.nih.gov>), viz. *Disctyostelium*  
87 *discoideum* (XP\_639160.2), *Saccharomyces cerevisiae* (KZV08504.1), *Schizosaccharomyces pombe*  
88 (NP\_593780.1), *Caenorhabditis elegans* (NP\_502609.2), *Strongylocentrotus purpuratus* (XM\_781343.4),  
89 *Danio rerio* (AAH66577.1), *Xenopus tropicalis* (CAJ83772.1), *Gallus gallus* (XP\_004949329.1), *Mus*  
90 *musculus* (NP\_081766.1), *Rattus norvegicus* (NP\_001163940.1), *Homo sapiens* (EAW48988.1),  
91 *Drosophila melanogaster* (NP\_648805.2), *D. ananassae* (XP\_001957344.1), *D. erecta*  
92 (XP\_015013047.1), *D. grimshawi* (XP\_001985489.1), *D. mojavensis* (XP\_002008663.2), *D. persimilis*  
93 (XP\_002021219.1), *D. pseudoobscura pseudoobscura* (XP\_001353423.3), *D. sechellia*  
94 (XP\_002030644.1), *D. simulans* (XP\_016032029.1), *D. virilis* (XP\_002048412.1), *D. willistoni*  
95 (XP\_023031850.1) and *D. yakuba* (XP\_015045072.1).

96 Sequences of the DCP2 paralogs in *Drosophila melanogaster* were procured from the FlyBase  
97 (<http://www.flybase.org>), viz., CG2091 (NP\_649582), Apf (NP\_723505), Aps (NP\_648421), CG8128  
98 (NP\_573053), CG12567 (NP\_001015384), CG42813 (NP\_733202), CG10898 (CG\_650083), CG18094  
99 (NP\_609974), CG10194 (NP\_609973), CG10195 (NP\_609970), CG11095 (NP\_572927) and CG42814  
100 (NP\_001189301).

101 The sequences were manually analysed for sequence features, viz., amino acid sequence and size of the  
102 Box A, spacer and NUDIX domains and the remaining N- and C-terminal regions, and a graphical  
103 representation of the same was performed using MS-Excel 2010.

#### 104 **Multiple Sequence Alignment (MSA), Percent Identity Matrix (PIM) analyses and evolutionary** 105 **relationships**

106 Multiple Sequence Alignment (MSA) and calculation of Percent Identity Matrix (PIM) were performed  
107 using Clustal Omega (EBI; <https://www.ebi.ac.uk/Tools/msa/clustalo/>), while evolutionary relationships  
108 were inferred using the Maximum Likelihood method using the PhyML (Guindon et al., 2010) software  
109 (<http://www.atgc-montpellier.fr/phyml/>).

#### 110 **Structural analyses**

111 The secondary structure of the DCP2-PA isoform was deduced using PSIPRED (Jones, 1999;  
112 <http://bioinf.cs.ucl.ac.uk/psipred/>) tool, while the tertiary structure was determined using the I-TASSER  
113 (Roy et al., 2010; <https://zhanglab.ccmb.med.umich.edu/I-TASSER/>) tool. The structure was visualized  
114 and analysed for the different features with an offline tool, UCSF Chimera (NIH;  
115 <https://www.cgl.ucsf.edu/chimera/>). The backbone confirmation was evaluated by inspection of the

116 Phi/Psi angles using the Ramachandran plot (Ramachandran *et al.*, 1963) using the RAMPAGE tool,  
117 available online (<http://mordred.bioc.cam.ac.uk/~rapper/rampage.php>).

## 118 **Results**

### 119 **The sequence of NUDIX domain of DCP2 is much more conserved than the rest of the protein** 120 **sequence**

121 The linear sequence of amino acids in DCP2 can be conveniently categorized into five different segments,  
122 *viz.*, the N-terminal region, *i.e.*, from the pioneering amino acid to the Box A domain, the Box A domain,  
123 the spacer tripeptide, the NUDIX domain and the C-terminal region, *i.e.*, after the NUDIX domain till the  
124 carboxy-terminus. The orthologs were first analysed for the total number of amino acids and further  
125 assessed for the number of amino acids harbored in or constituting the individual segments. Since the Box  
126 A and the NUDIX domains are the two classic domains of DCP2, they along with the spacer tripeptide  
127 were analysed for the identity of the pioneering and terminal amino acid residues. The proteins were then  
128 assessed for the conservation of sequence of the complete protein and then for the NUDIX domain only,  
129 following which, the molecular phylogenetic relationships were also identified.

#### 130 **a. Vertebrate orthologs of DCP2 show higher degree of conservation than invertebrate** 131 **counterparts**

132 Among the orthologs harbored by the representative species of the phylogenetic tree, except for  
133 *Dictyostelium*, *Caenorhabditis* and *Drosophila*, all other species have a short N-terminal or pre-Box A  
134 sequence and harbor the two classic domains close to the N-terminal. The Box A domain does not vary  
135 appreciably in length (82-85 residues), except for the *Drosophila melanogaster* ortholog, wherein it is 95  
136 residues long. While the pioneering residue of the Box A domain varies in the invertebrates, the C-  
137 terminal residue is conserved in all the species {Tyrosine (Y)}. The Box A domain is followed by the  
138 spacer sequence, which is a tripeptide stretch and begins with Lysine (K). The lower members show  
139 variability in composition but the vertebrates show a constant conserved sequence of Lysine (K) –  
140 Methionine (M) – Serine (S). The NUDIX domain is conserved in length and sequence and almost always  
141 starts with Valine (V), except for the yeasts, *Saccharomyces cerevisiae* and *Schizosaccharomyces pombe*,  
142 wherein it starts with Isoleucine (I). The terminal residue is variable however, but is conserved in the  
143 vertebrates. Notably, the vertebrate orthologs are shorter in length as compared to the lower members, and  
144 show a higher degree of conservation, both in composition and location of sequence and in size.  
145 Moreover, the number of amino acids constituting the protein decreases in the vertebrate phyla (**Table 1**  
146 **and Figure 1**). Closer analyses of the complete DCP2 sequence and the sequence of the NUDIX motif

147 harbored, through percentage identity matrices (**Figure 2 A and B**), shows that the vertebrate orthologs  
148 are more conserved in either case as compared to their invertebrate predecessors. Strikingly, although the  
149 two yeast species analysed, occupy similar positions in the evolutionary tree, they show extremely low  
150 homology among themselves. Moreover, the *S. cerevisiae* (budding yeast) ortholog shows the least  
151 homology with all the other species analysed. However, in all the species considered here, the sequence  
152 of the NUDIX domain shows a better index of homology as compared to the sequence of the entire DCP2  
153 protein.

154 On inspection of the molecular phylogenetic relationships among the orthologs through Maximum  
155 Likelihood method, the yeasts harbor the oldest orthologs, while the *Xenopus* ortholog is the youngest.  
156 The vertebrate orthologs appear to have originated from a common ancestral form which the *C. elegans*  
157 (annelid), *D. melanogaster* (insect) and *S. purpuratus* (echinoderm) orthologs evolved.

158 Thus, the vertebrate orthologs show a higher degree of molecular conservation than the invertebrate  
159 members.

160 **b. Among *Drosophila* sp., the *melanogaster* DCP2 ortholog is closest to that harbored by the**  
161 ***repleta* sub-group**

162 Following the analysis across the different phyla of the evolutionary tree, the analysis was extended to the  
163 twelve species of *Drosophila*, whose genomic data was available on FlyBase. These species belonged to  
164 six different subgroups viz., *melanogaster* (*D. melanogaster*, *D. ananassae*, *D. erecta*, *D. yakuba*, *D.*  
165 *simulans* and *D. sechellia*), *obscura* (*D. persimilis* and *D. pseudoobscura pseudoobscura*), *virilis* (*D.*  
166 *virilis*), *repleta* (*D. mojavensis*), *Hawaiian* (*D. grimshawi*) and *willistoni* (*D. willistoni*) and were  
167 analysed similarly for the amino acid sequence composition of DCP2. *D. grimshawi* (*Hawaiian* species)  
168 was observed to harbor the longest ortholog (926 residues) while that harbored by *D. persimilis* (*obscura*  
169 subgroup) is the shortest (570 residues). The length of the N-terminus to the Box A domain is fairly  
170 uniform across the species except for *D. persimilis*, which has only one (1) amino acid residue preceding  
171 its Box A domain. Also, the Box A domain is composed of only 77 residues and starts with Glutamic acid  
172 (E), whereas in all the other species, it is composed of ~93-95 residues and starts with Aspartic acid (D).  
173 *D. willistoni* however employs 115 residues to generate the same domain, but the pioneering (Aspartic  
174 acid; D) and the terminal (Tyrosine; Y) residues are the same as others. The tripeptide spacer sequence,  
175 viz., Lysine (K) – Leucine (L) – Serine (S), is conserved in all the species except that the central residue in  
176 the two species of the *obscura* subgroup is Methionine (M). The NUDIX domain is highly conserved with  
177 constant length (150 residues) and starts with Valine (V) and terminates in Isoleucine (I) (**Table 2 and**  
178 **Figure 3**).

179 Closer analyses of the complete DCP2 sequence and the sequence of the NUDIX motif harbored, through  
180 percentage identity matrices (**Figure 4 A and B**), shows that the *melanogaster* orthologs are more  
181 conserved in either case as compared to their siblings. Strikingly, although *D. ananassae* belongs to the  
182 same subgroup, it shows the least similarity with the other species of the subgroup. Moreover, the *D.*  
183 *persimilis* ortholog shows better homology with the species of the *melanogaster* subgroup analysed.  
184 However, in all the species considered here, the sequence of the NUDIX domain shows a better index of  
185 homology as compared to the sequence of the entire DCP2 protein, and the observed differences in the  
186 total protein sequence is majorly attributed to the differences in the N- and C-terminal sequences. The  
187 only exceptions are observed in the *virilis* (*D. virilis*), *repleta* (*D. mojavensis*), *Hawaiian* (*D. grimshawi*)  
188 species, where the sequence of the complete protein ortholog is more similar than that of the NUDIX  
189 domain.

190 On inspection of the molecular phylogenetic relationships among the orthologs through Maximum  
191 Likelihood method, the *obscura* subgroup harbors the oldest orthologs. The *melanogaster* orthologs  
192 appear to have originated from a common ancestral form which the *virilis* (*D. virilis*), *repleta* (*D.*  
193 *mojavensis*), *Hawaiian* (*D. grimshawi*) orthologs evolved. Plausibly, the *melanogaster* ortholog is closer  
194 to that harbored by the *repleta* subgroup.

195 Hence, from the analyses of the different representative species across the phylogenetic tree, the sequence  
196 of the NUDIX domain is evidently more conserved than that of the rest of the protein.

### 197 ***In silico* predictions of the DmDCP2 structure identify distinct topological paradigms in the** 198 **secondary and tertiary structures**

199 Structural features of proteins provide newer insights into their functional potential by throwing light on  
200 the mechano-dynamic properties, plausible interactome and the possible functional diversity.  
201 Determination of structure of a protein involves multiple stages and is accomplished through standard  
202 biophysical approaches, the most popular ones involving as analyses of x-ray diffraction (XRD) patterns  
203 by crystals of the protein or nuclear magnetic resonance (NMR) spectroscopic analyses of the protein in  
204 solution (Alberts, 2002). However, both of these methods require the protein to be over-expressed,  
205 isolated and purified through rigorous molecular biological protocols in the wet lab. With the advent of *in*  
206 *silico* modeling platforms, which require only the primary sequence of the protein, it is possible to  
207 generate putative models to identify and analyse the putative structural features of any given protein. In  
208 the present analysis, instead of using homology based modeling approach, the sequence was first assessed  
209 for its secondary structure and then a threading based approach was employed to generate the tertiary



210 structure using the I-TASSER platform (Zhang, 2008; Roy et al., 2010), which is an online server and  
211 generates protein structures by iterative fragment assembly simulations.

#### 212 **a. Secondary structure of DmDCP2**

213 Prediction of secondary structure of the *Drosophila* mRNA decapping protein 2 using PSIPRED (**Figure**  
214 **5**) shows that the sequence is conducive for the formation of a number of helices, connected by random  
215 coils and that very few regions engage in the formation of beta strands. Two sets of sequences, depicting  
216 the two classic motifs of DCP2, are underlined. Amino acids 212-306, underlined green and consist solely  
217 of alpha helices, form the Box A domain (pfam05026), while the amino acids 310-459, underlined purple  
218 and consist of alpha helices interspersed with beta strands, form the classic NUDIX (**N**ucleoside  
219 **d**iphosphate linked to moiety **X**; cd03672) domain which catalyses the removal of the methylguanosine  
220 cap from the five prime end of mRNAs. Most notably, the only beta strands in the entire protein are the  
221 ones forming the NUDIX Motif.

#### 222 **b. The tertiary structure of DmDCP2 shows an evolutionarily conserved topology of the NUDIX** 223 **domain**

224 The tertiary structure of DmDCP2 (DCP2-PA; 791 residues) shows that most of the protein engages in  
225 the formation of random coils which are interspersed with short helices and the only beta strands are  
226 found in the NUDIX domain (**Figure 6A**). While the Box A domain is an all helical structure, the NUDIX  
227 domain is a compact structure in the tree-dimensional space, being composed of four (4) alpha helices  
228 (*viz.*,  $\alpha_{1N-4N}$ ) and six (6) beta strands (*viz.*,  $\beta_{1N-4N}$ ) (**Figure 6 A; inset**). The N-terminal regulatory domain  
229 (RD; Wurm and Sprangers, 2019) is mostly comprised of tightly packed random coils whereas the C-  
230 terminal intrinsically disordered region (IDR; Wurm and Sprangers, 2019) consists of random coils and  
231 small helices packed loosely, similar to the human ortholog. To assess the backbone confirmation, the  
232 Phi ( $\phi$ ) /Psi ( $\psi$ ) angles were analysed using the Ramachandran plot (Ramachandran *et al.*, 1963), which  
233 showed 55.6% (439/791) residues to reside in the *favourable region* and 23.2% (183/791) residues to  
234 reside in the *allowed region*, while only 21.2% (167/791) residues were found to be in the *outlier region*  
235 (**Figure 7**), which showed that the model may be quite close to that obtained by wet lab approaches. The  
236 protein binds to guanosine triphosphate (GTP), which is coordinated by the Asp<sub>396</sub>, Gln<sub>398</sub>, Ala<sub>400</sub> and the  
237 Arg<sub>402</sub> residues (**Figure 8 A**), all of which belong to the NUDIX domain. A nitrogen atom (N2) from the  
238 GTP moiety also forms a hydrogen bond with the Ala<sub>400</sub> residue. DCP2 requires magnesium ions (Mg<sup>2+</sup>)  
239 ions for its activity and in the model obtained, the Mg<sup>2+</sup> ion is found to be coordinated by Glu<sub>357</sub> and  
240 Arg<sub>404</sub> residues (**Figure 8 B**). On comparing the structure with the crystal structures of the yeast (PDB ID:  
241 5J3Y; Chain A) and human (PDB ID: 5QPC; Chain A), orthologs, the topology of the NUDIX domain of



242 the generated model was found to be in complete alignment with that of the crystal structures (**Figure 8 B**  
243 **and C**), thereby revealing an evolutionarily conserved topology of the NUDIX domain despite sequence  
244 diversity.

#### 245 **NUDIX proteins *vis-à-vis* DCP2 paralogs in *D. melanogaster* show topological conservation of the** 246 **NUDIX domain despite sequence divergence**

247 Although the NUDIX proteins consist primarily of pyrophosphohydrolases (Bessman et al, 1996), they  
248 are involved in multiple functions in the cell and some of the NUDIX proteins are non-enzymatic in  
249 nature and function as modulators of cellular function by interacting with other proteins or are modulators  
250 of transcription (Srouji et al, 2017). Despite availability of information pertaining to the kinetics,  
251 evolution or dynamics of NUDIX proteins through *in silico* or wet molecular approaches, the  
252 identification and understanding of other NUDIX proteins in *Drosophila* is still in its infancy and remains  
253 unexplored. Hence, in order to identify the other NUDIX proteins in *D. melanogaster*, the amino acid  
254 sequence of the DCP2 NUDIX domain was used as “bait” in a homology search to fish out other NUDIX  
255 proteins. Since, all these proteins bear the same functional catalytic domain – the NUDIX domain, these  
256 may be referred to, as the paralogs of DCP2.

257 These proteins were assessed for the conservation of sequence of the complete protein and then for the  
258 NUDIX domain only, following which, the molecular phylogenetic relationships were also identified. The  
259 proteins were then modelled to deduce their tertiary structure, which were then aligned individually with  
260 the generated structure of DmDCP2 to identify regions of structural homology.

#### 261 **a. NUDIX proteins in *D. melanogaster* show extremely low sequence conservation**

262 Through a homology search in the FlyBase, twelve (12) NUDIX proteins were identified besides DCP2,  
263 out of which eight (8; including DCP2) had their NUDIX sequence annotated. **Table 3** shows the list of  
264 the NUDIX proteins identified in the homology search, their sizes, the length of the NUDIX domain  
265 including the pioneering and terminal residues of it, the presence of other domains in the rest of the  
266 protein chain and their subcellular location. All the proteins identified are hydrolases with different  
267 substrate specificity and thus perform different functions in the cell. Out of the identified proteins, one  
268 protein, CG2091 is the putative Scavenger decapping enzyme (DcpS). Most notably, except DCP2, all the  
269 other proteins are shorter in length and smaller in size.

270 Closer analyses of the complete sequence of the protein and the sequence of the NUDIX motif harbored,  
271 through percentage identity matrices (**Figure 9 A and B**), shows that the proteins show extremely low  
272 sequence similarity among themselves. Strikingly, DCP2 shows very low homology with the scavenger

273 decapping enzyme, DcpS, despite functional similarity. In the PIM, CG8128, which is a nucleotide  
274 diphosphatase *vis-à-vis* ADP-ribose diphosphatase, and CG10898, which is a hydrolase with  
275 uncharacterized function are the only pair of proteins which show a better index of sequence similarity as  
276 compared to paired analysis of other proteins. Although all the proteins bear the NUDIX motif, the  
277 sequence of the motif varies among them and shows extremely low degree of conservation.

278 On inspection of the molecular phylogenetic relationships among the orthologs through Maximum  
279 Likelihood method, it seems that the NUDIX motifs and the sequence of the complete protein *per se* of  
280 DCP2 (a diphosphatase), Apf (a tetraphosphatase) and CG42813 (a diphosphatase) have plausibly  
281 evolved from a common ancestral sequence, which diverged across time to give way to the functional  
282 divergence observed. Also, DcpS (decapping enzyme; diphosphatase) presumably shares a closer  
283 phylogenetic relationship with CG12567 (8-oxo- dGTP-phosphatase) instead of DCP2 and is a more  
284 recently evolved protein unlike DCP2.

#### 285 **b. The topology of the NUDIX domain is conserved despite lack of sequence conservation**

286 On modeling the NUDIX proteins *in silico* (**Figure 10**), all the proteins showed their NUDIX domains  
287 being composed of alpha helices and beta strands, similar to that observed in DCP2, but all the proteins  
288 had beta strands in other regions of the protein sequence as well, unlike DCP2. Moreover, they lack the  
289 extensive stretches of random coils and occupy a smaller volume in space. However, on aligning them to  
290 the structure of DCP2 so generated, the tertiary structure of the NUDIX motif of all the proteins, except  
291 DcpS and CG8128 were similar to each other and to that of DCP2 (**Figure 11**), reflecting an evolutionary  
292 conservation of the structure of the NUDIX domain despite lack of sequence similarity *vis-à-vis*  
293 conservation. Although DCP2 and DcpS share a functional similarity, they do not show similarities in  
294 either sequence or structure, even in the functional domain which confers the functional identity and  
295 similarity to them.

#### 296 **Conclusion**

297 The present endeavor is an effort to identify and discern the extent of conservation of the amino acid  
298 sequence of the mRNA decapping protein 2, DCP2, which is NUDIX protein, in different species across  
299 the phylogenetic tree and in the sibling species of *Drosophila melanogaster*, which occupy the same  
300 taxon in the tree, and to identify the similar relationships of DCP2 with its paralogs in *D. melanogaster*.  
301 The study shows that while the sequence of the NUDIX domain is much more conserved than the rest of  
302 the protein sequence across species, the complete amino acid sequence of DCP2 shows increasing degree  
303 of conservation as we ascend the evolutionary tree, with the vertebrate orthologs emerging from a

304 common ancestral isoform. Interestingly, although functionally conserved, a gradual decrease in the size  
305 of the protein in visible parallel to the ascent in the tree, and the decrease occurs primarily in the  
306 sequences beyond the NUDIX motif, *i.e.*, at the N- and C-termini. On modeling the structure of  
307 DmDCP2, the tertiary structure of the NUDIX motif reflects an evolutionary conservation of topology,  
308 showing structural homology *vis-à-vis* conservation with the lowest (yeast) and the highest (human)  
309 DCP2 structures despite sequence divergence along evolution, which is in agreement with the fact that the  
310 domain architecture of orthologous proteins is always conserved (Forslund et al, 2011). An inspection of  
311 the other NUDIX proteins in *D. melanogaster* with reference to the conservation of their sequence and  
312 structure reinforces the observation that despite the evolution of protein sequence by mutations, both  
313 locally and/or globally, which may have given rise to their functional divergence, the structure of  
314 functional domains is far more conserved than sequence (Illergard et al, 2009).

315 Hence, the present observations provide quantitative and structural bases for the observed evolutionary  
316 conservation of DCP2 across the diverse phyla and also, identify and reinforce the structural conservation  
317 of the NUDIX family in *D. melanogaster*.

#### 318 **Author Contributions**

319 RK, conceptualization, resources, methodology, investigation, data curation, formal analysis and  
320 interpretation, writing the manuscript. JKR, supervision.

#### 321 **Conflict of Interest**

322 The authors declare no conflict of interest.

323

324 **References**

- 325 Alberts B., Johnson A., Lewis J., Raff M., Roberts K., Walter P. (2002). The shape and structure of  
326 proteins. *Molecular Biology of the Cell*. Garland Science, New York.
- 327 Bessman M.J., Frick D.N., O'Handley S.F. (1996). The MutT proteins or “Nudix” hydrolases, a family of  
328 versatile, widely distributed, “housecleaning” enzymes. *Journal of Biological Chemistry* 271: 25059-  
329 25062.
- 330 Dunckley T., Parker R. (1999). The DCP2 protein is required for mRNA decapping in *Saccharomyces*  
331 *cerevisiae* and contains a functional MutT motif. *The EMBO Journal* 18: 5411-5422.
- 332 Forslund K., Pekkari I., Sonnhammer E.L. (2011). Domain architecture conservation in orthologs. *BMC*  
333 *Bioinformatics* 12: 326.
- 334 Grudzien-Nogalska E., Kiledjian M. (2017). New insights into decapping enzymes and selective mRNA  
335 decay. *Wiley Interdisciplinary Reviews: RNA* 8: e1379.
- 336 Guindon S., Dufayard J.F., Lefort V., Anisimova M., Hordijk W., Gascuel O. (2010). New algorithms  
337 and methods to estimate maximum-likelihood phylogenies: assessing the performance of PhyML  
338 3.0. *Systematic Biology* 59: 307-321.
- 339 Illergård K., Ardell D.H., Elofsson A. (2009). Structure is three to ten times more conserved than  
340 sequence – a study of structural response in protein cores. *Proteins: Structure, Function, and*  
341 *Bioinformatics* 77: 499-508.
- 342 Jensen R.A. (2001). Orthologs and paralogs-we need to get it right. *Genome Biology* 2: interactions1002-  
343 1.
- 344 Jones D.T. (1999). Protein secondary structure prediction based on position-specific scoring  
345 matrices. *Journal of Molecular Biology* 292: 195-202.
- 346 Li Y., Kiledjian M. (2010). Regulation of mRNA decapping. *Wiley Interdisciplinary Reviews: RNA* 1:  
347 253-265.
- 348 Mitchell P., Tollervey D. (2001). mRNA turnover. *Current Opinion in Cell Biology* 13: 320-325.
- 349 Raghavan A., Bohjanen P.R. (2004). Microarray-based analyses of mRNA decay in the regulation of  
350 mammalian gene expression. *Briefings in Functional Genomics* 3: 112-124.

- 351 Ramachandran G.N., Ramakrishnan C., Sasisekharan V. (1963). Stereochemistry of polypeptide chain  
352 configurations. *Journal of Molecular Biology* 7: 95-99.
- 353 Roy A., Kucukural A., Zhang Y. (2010). I-TASSER: a unified platform for automated protein structure  
354 and function prediction. *Nature Protocols* 5: 725-738.
- 355 She M., Decker C.J., Svergun D.I., Round A., Chen N., Muhlrads D., Parker R., Song H. (2008). Structural  
356 basis of dcp2 recognition and activation by dcp1. *Molecular Cell* 29: 337-349.
- 357 Sitbon E., Pietrokovski S. (2007). Occurrence of protein structure elements in conserved sequence  
358 regions. *BMC Structural Biology* 7: 3.
- 359 Song M.G., Li Y., Kiledjian M. (2010). Multiple mRNA decapping enzymes in mammalian cells.  
360 *Molecular Cell* 40: 423-432.
- 361 Srouji J.R., Xu A., Park A., Kirsch J.F., Brenner S.E. (2017). The evolution of function within the Nudix  
362 homology clan. *Proteins: Structure, Function, and Bioinformatics* 85: 775-811.
- 363 Wang Z., Jiao X., Carr-Schmid A., Kiledjian M. (2002). The hDcp2 protein is a mammalian mRNA  
364 decapping enzyme. *Proceedings of the National Academy of Sciences* 99: 12663-12668.
- 365 Wurm J.P., Sprangers R. (2019). Dcp2: an mRNA decapping enzyme that adopts many different shapes  
366 and forms. *Current Opinion in Structural Biology* 59: 115-123.
- 367 Zhang Y. (2008). I-TASSER server for protein 3D structure prediction. *BMC Bioinformatics* 9: 40.
- 368

369 **Figures**

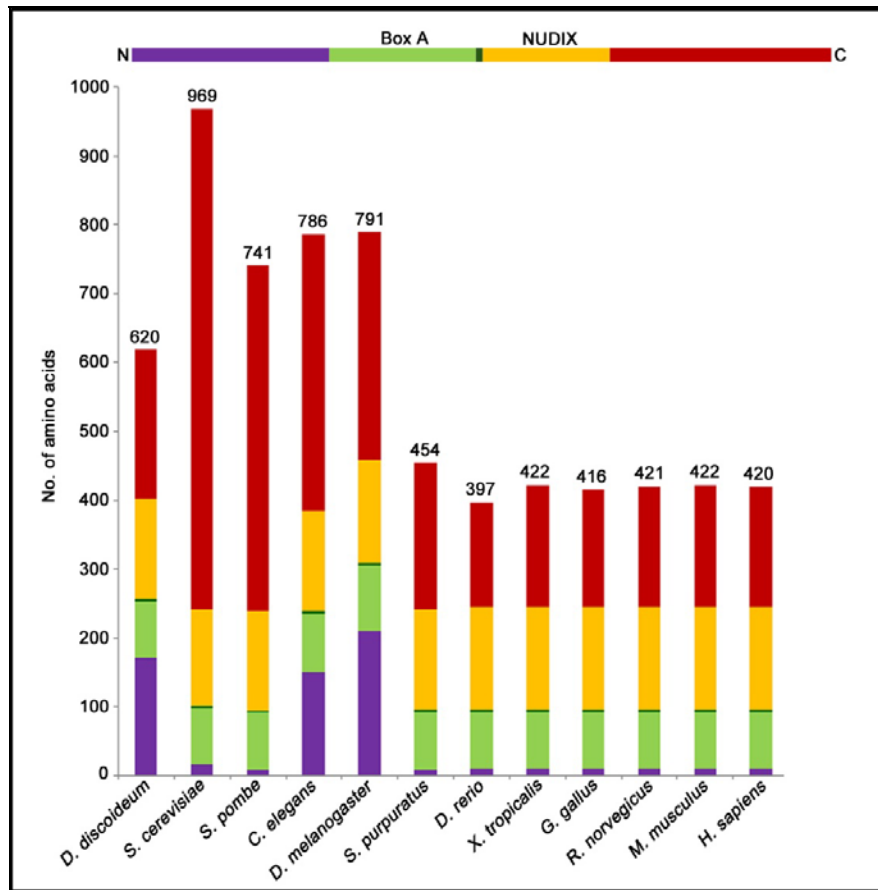

370

371 **Figure 1: Graphical representation of the different regions of the DCP2 orthologs across the**  
372 **phylogenetic tree.** The representative invertebrate orthologs harbor longer sequences while the  
373 representative vertebrate orthologs comprise of lesser number of residues. While *Saccharomyces*  
374 *cerevisiae* harbors the longest ortholog, the vertebrate orthologs do not show appreciable difference in the  
375 total number of amino acids as well as those constituting the individual regions.

376

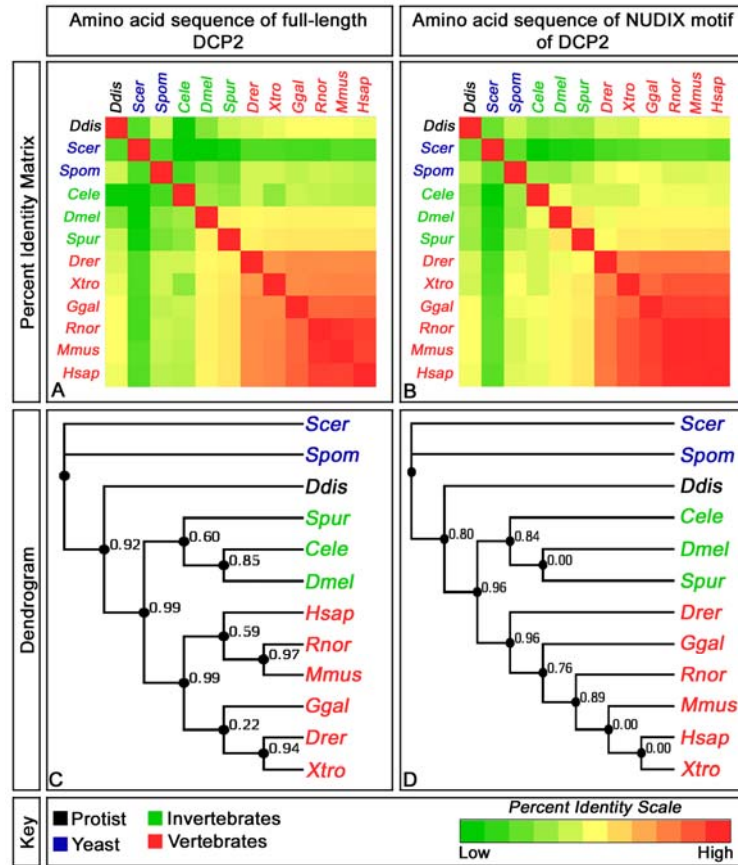

377

378 **Figure 2: Sequence identity and evolutionary relationships of DCP2 orthologs across the**  
 379 **phylogenetic tree.** A shows the sequence similarity of the complete linear sequence of DCP2 across the  
 380 different phyla while B shows the same for the sequence of the NUDIX motif in these orthologs. C and D  
 381 show the respective dendrograms derived from the above percent identities in A and B respectively.

382



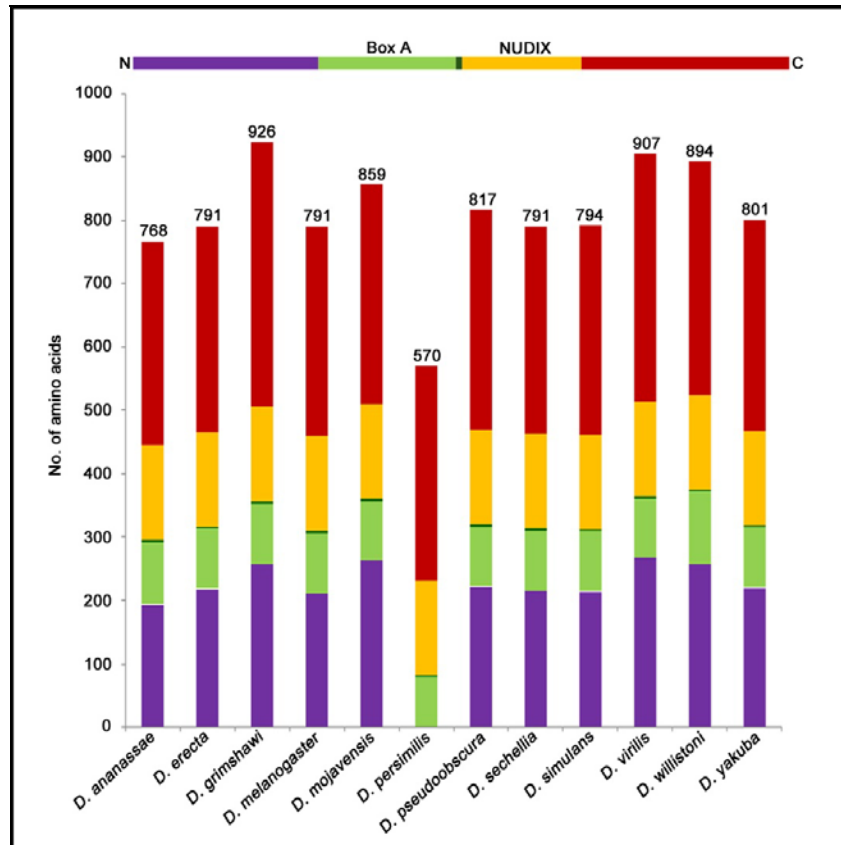

383

384 **Figure 3: Graphical representation of the different regions of the DCP2 orthologs in sibling species**  
385 **of *Drosophila melanogaster*.** *D. grimshawi* (Hawaiian species) harbours the longest ortholog (926  
386 residues) while that harbored by *D. persimilis* (*obscura* subgroup) is the shortest (570 residues). The  
387 length of the N-terminus to the Box A domain is fairly uniform across the species except for *D.*  
388 *persimilis*, which has only one (1) amino acid residue preceding its Box A domain). The NUDIX domain  
389 is highly conserved with constant length (150 residues).

390

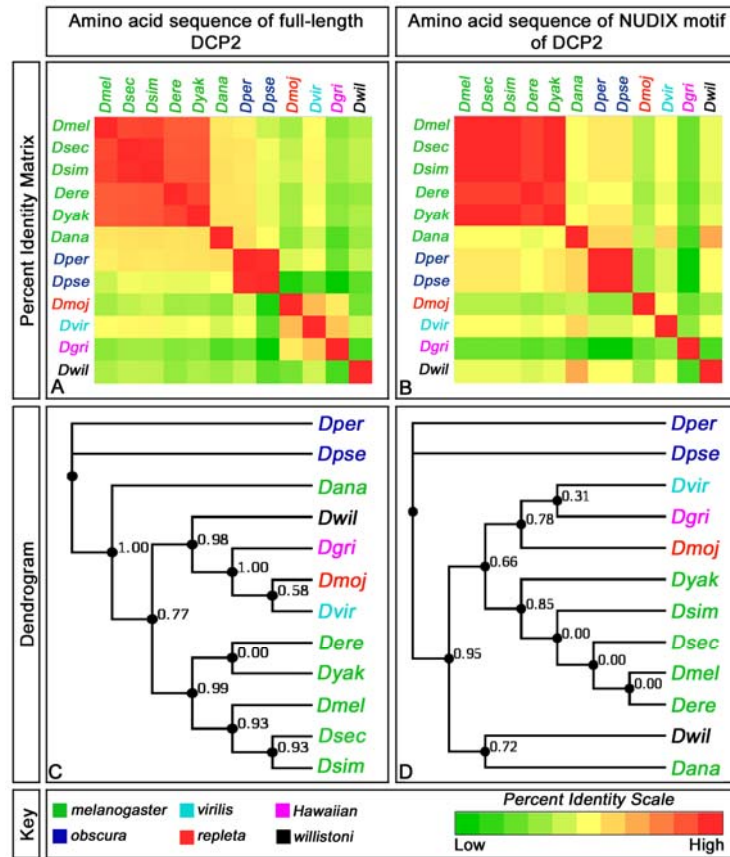

391

392 **Figure 4: Sequence identity and evolutionary relationships of DCP2 orthologs in sibling species of**  
 393 ***Drosophila melanogaster*.** A shows the sequence similarity of the complete linear sequence of DCP2  
 394 across the different species of *Drosophila*, belonging to six different subgroups while B shows the same  
 395 for the sequence of the NUDIX motif in these orthologs. C and D show the respective dendrograms  
 396 derived from the above percent identities in A and B respectively.

397

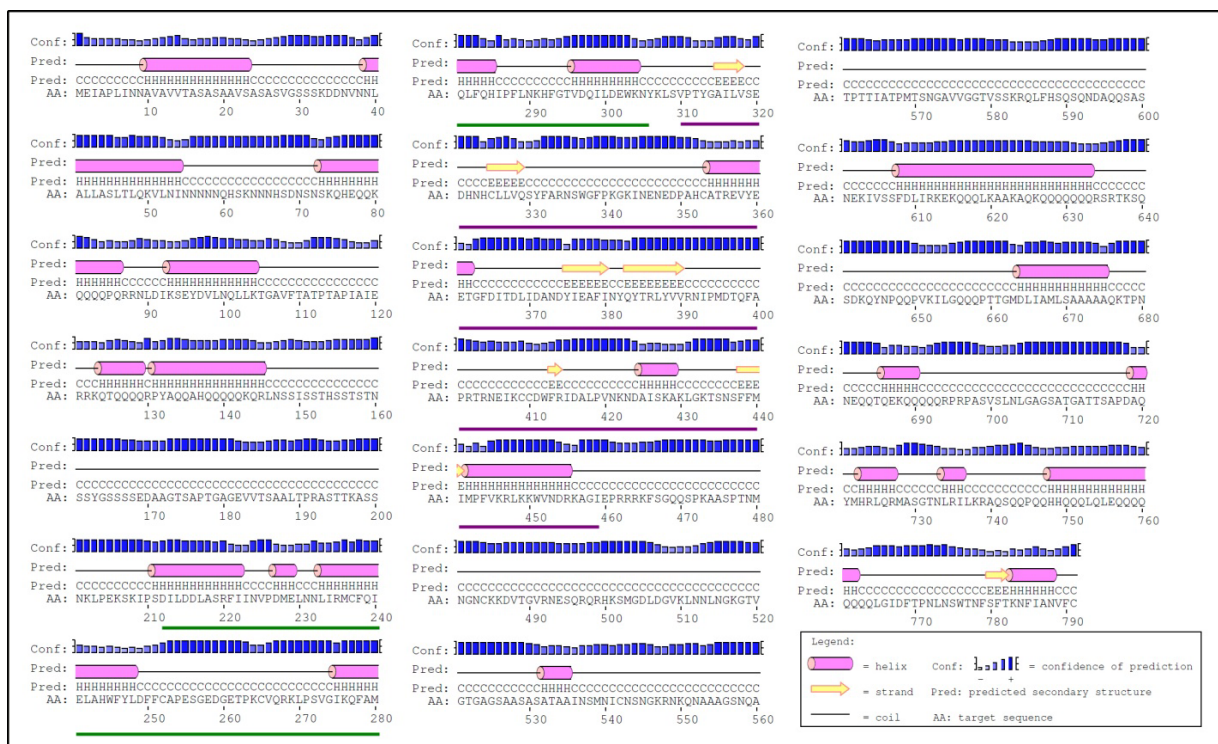

398

399 **Figure 5: Predicted secondary structure of DmDCP2-PA.** Predicted secondary structure of the  
 400 *Drosophila* mRNA decapping protein 2 shows that the sequence is conducive for the formation of a  
 401 number of helices connected by random coils. Two sets of sequences, depicting the two classic motifs of  
 402 DCP2, are underlined. Amino acids 212-306, underlined **green** and consist solely of alpha helices, form  
 403 the Box A domain while the amino acids 310-459, underlined **purple** and consist of alpha helices  
 404 interspersed with beta strands constitute the NUDIX domain. The only beta strands in the entire protein  
 405 are the ones forming the NUDIX Motif.

406

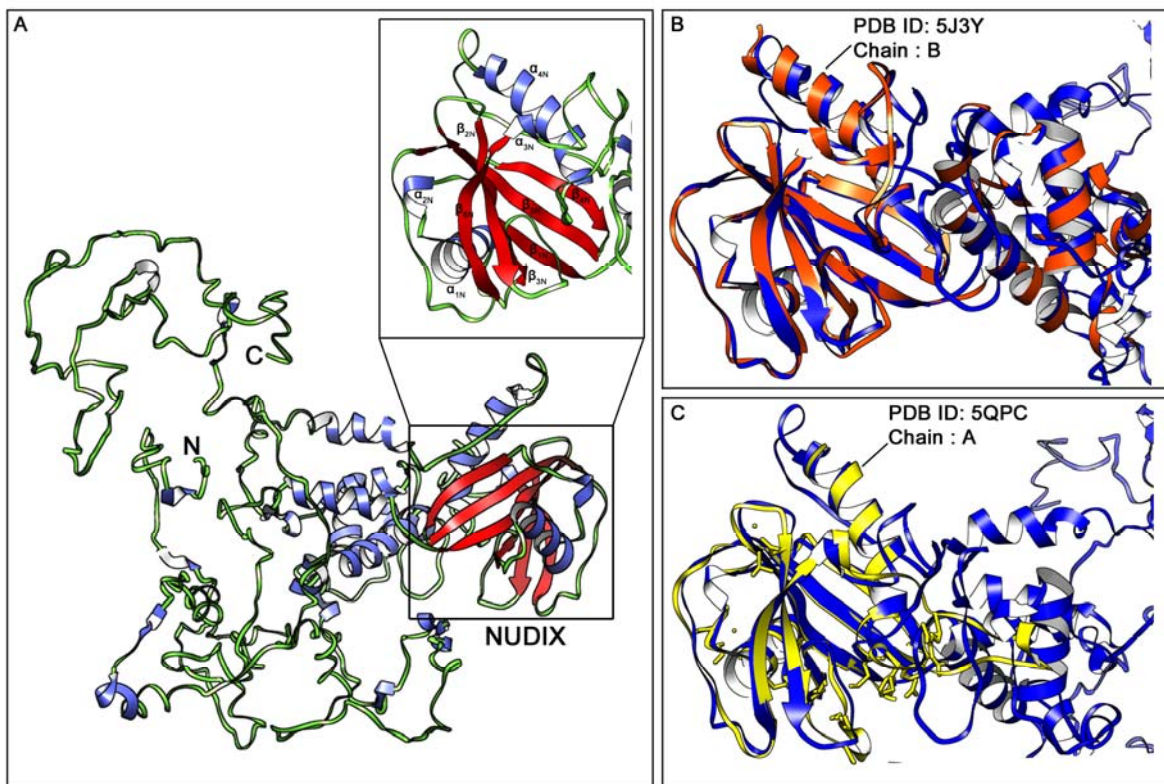

407

408 **Figure 6: Predicted tertiary structure of DmDCP2-PA.** Predicted tertiary structure of the *Drosophila*  
409 mRNA decapping protein 2 shows that most of the protein engages in the formation of **random coils**  
410 interspersed with short **helices**. The only **beta strands** are found in the NUDIX domain (A). While the  
411 Box A domain is an all helical structure, the NUDIX domain (A; inset) is a compact structure in the three-  
412 dimensional space, being composed of four (4) alpha helices (*viz.*,  $\alpha_{1N-4N}$ ) and six (6) beta strands (*viz.*,  
413  $\beta_{1N-4N}$ ). The N-terminal RD is mostly comprised of tightly packed random coils whereas the C-terminal  
414 IDR consists of random coils and small helices packed loosely, similar to the human ortholog. Structural  
415 comparison *vis-à-vis* alignment with the crystal structures of the yeast (B) and human (C) orthologs show  
416 the topology of the NUDIX domain of the generated model to be in complete alignment with that of the  
417 crystal structures.

418

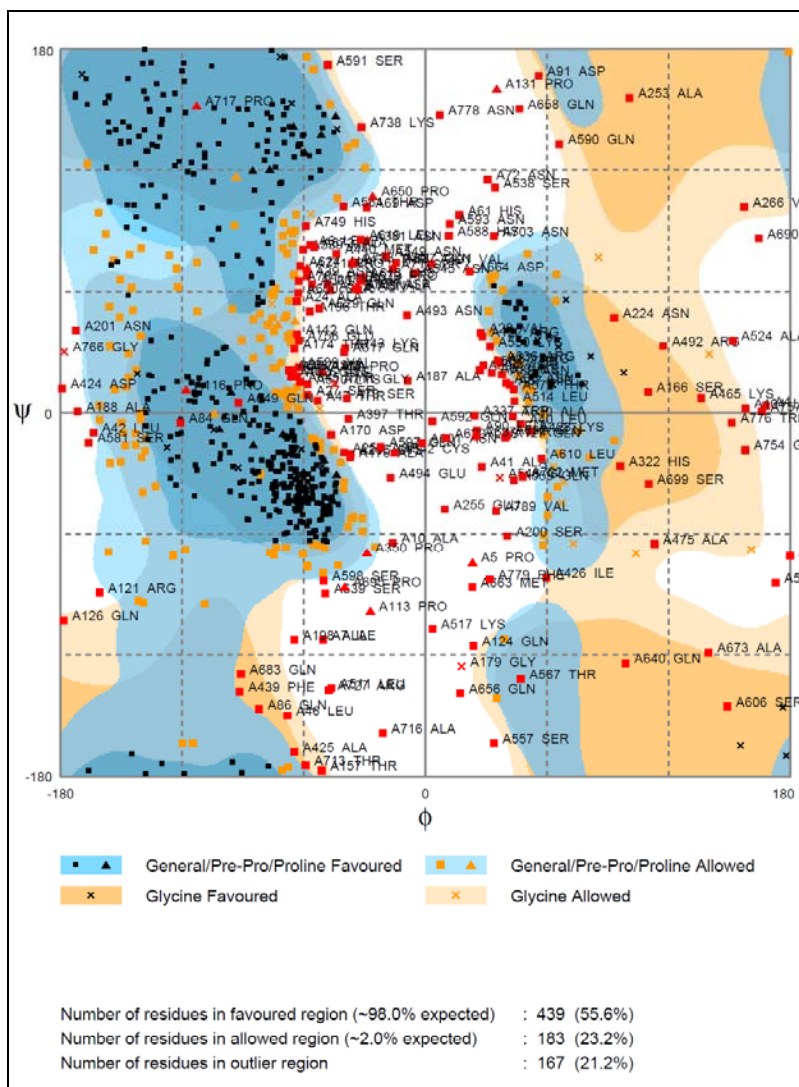

419

420 **Figure 7: Ramachandran plot of the predicted model of DmDCP2.** Analysis of the backbone  
421 conformation, *i.e.*, the Phi ( $\phi$ ) /Psi ( $\psi$ ) angles using the Ramachandran plot showed 55.6% (439/791)  
422 residues to reside in the *favourable region* and 23.2% (183/791) residues to reside in the *allowed region*,  
423 while only 21.2% (167/791) residues were found to be in the *outlier region*, implying the model to be  
424 quite close to that obtained by wet lab approaches.

425



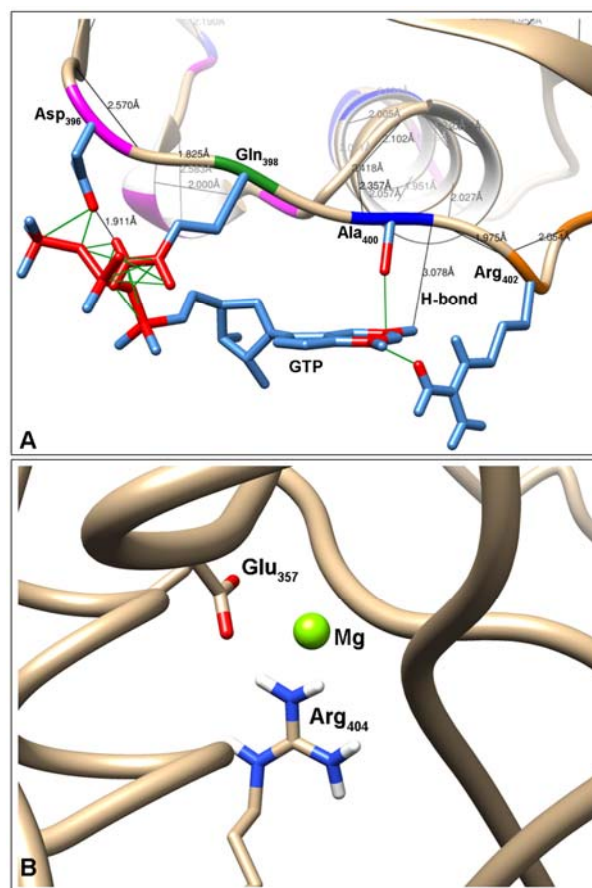

426

427 **Figure 8: Coordination of DmDCP2 to GTP and Mg<sup>2+</sup>.** The GTP is coordinated by the Asp<sub>396</sub>, Gln<sub>398</sub>,  
428 Ala<sub>400</sub> and the Arg<sub>402</sub> residues (A), all of which belong to the NUDIX domain. A nitrogen atom (N2) from  
429 the GTP moiety also forms a hydrogen bond with the Ala<sub>400</sub> residue. DCP2 requires magnesium ions  
430 (Mg<sup>2+</sup>) ions for its activity and in the model obtained, the Mg<sup>2+</sup> ion is found to be coordinated by Glu<sub>357</sub>  
431 and Arg<sub>404</sub> residues (B).

432

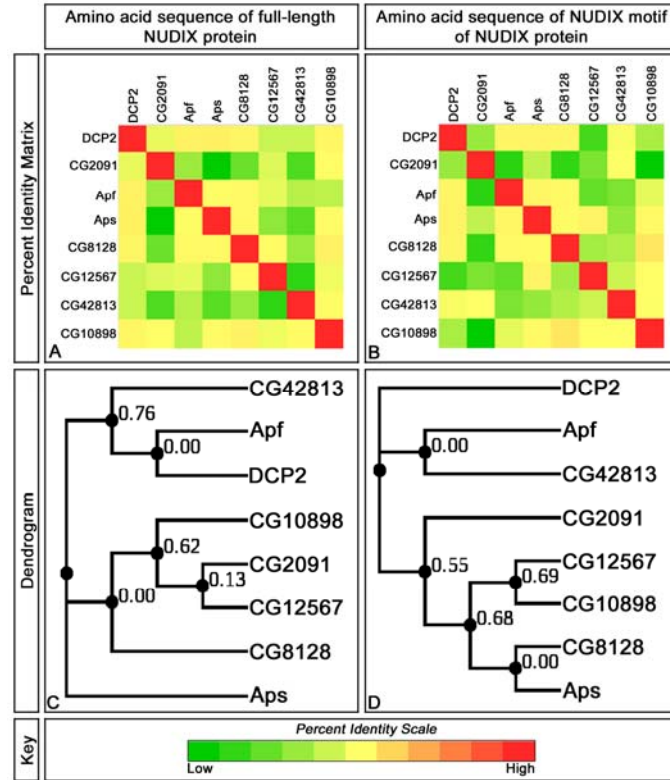

433

434 **Figure 9: Sequence identity and evolutionary relationships of DCP2 paralogs in *Drosophila***  
435 ***melanogaster*.** A shows the sequence similarity of the complete linear sequence of the NUDIX proteins  
436 while B shows the same for the sequence of the NUDIX motif in these orthologs. C and D show the  
437 respective dendrograms. Strikingly, DCP2 shows very low similarity DCPS, despite functional similarity.  
438 Most notably, CG8128 and CG10898 have a better index of sequence similarity as compared to other  
439 proteins. DCP2 shares a closer phylogenetic relationship with Apf as compared to other proteins and  
440 seems to have evolved from a common ancestral protein with Apf.

441



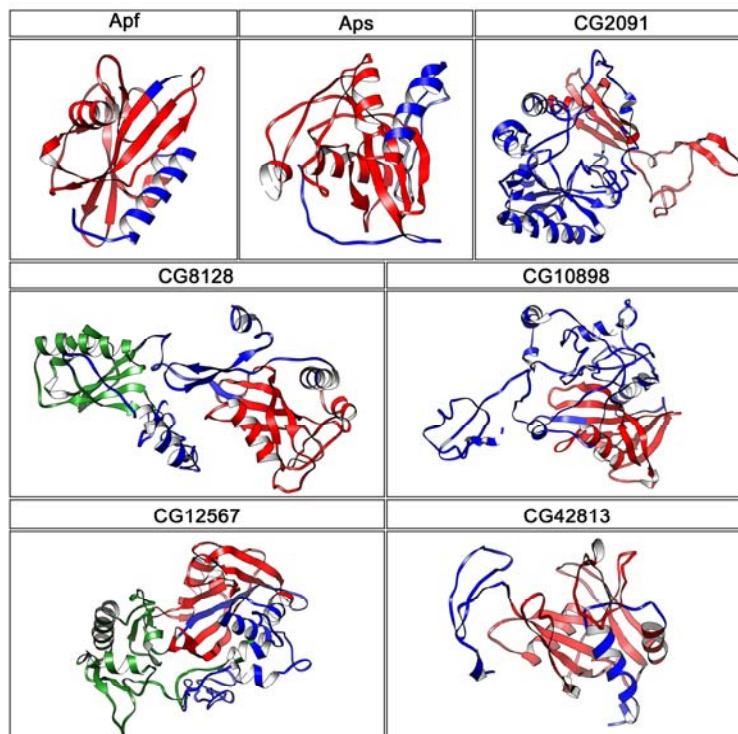

442

443 **Figure 10: Predicted tertiary structures of the NUDIX proteins in *D. melanogaster*.** All the proteins  
444 have NUDIX motif composed of alpha helices and beta sheets. Most strikingly, the other NUDIX proteins  
445 are composed of fewer amino acids as compared to DCP2 and have beta sheets in non-NUDIX regions as  
446 well unlike DCP2 which harbours beta sheets only in the NUDIX domain. Also, they lack the extensive  
447 stretches of random coils and occupy smaller volume in space. The **NUDIX** domain is painted in **red**,  
448 while the **alpha helices** and **beta strands** are depicted in **green** and **blue** respectively.

449

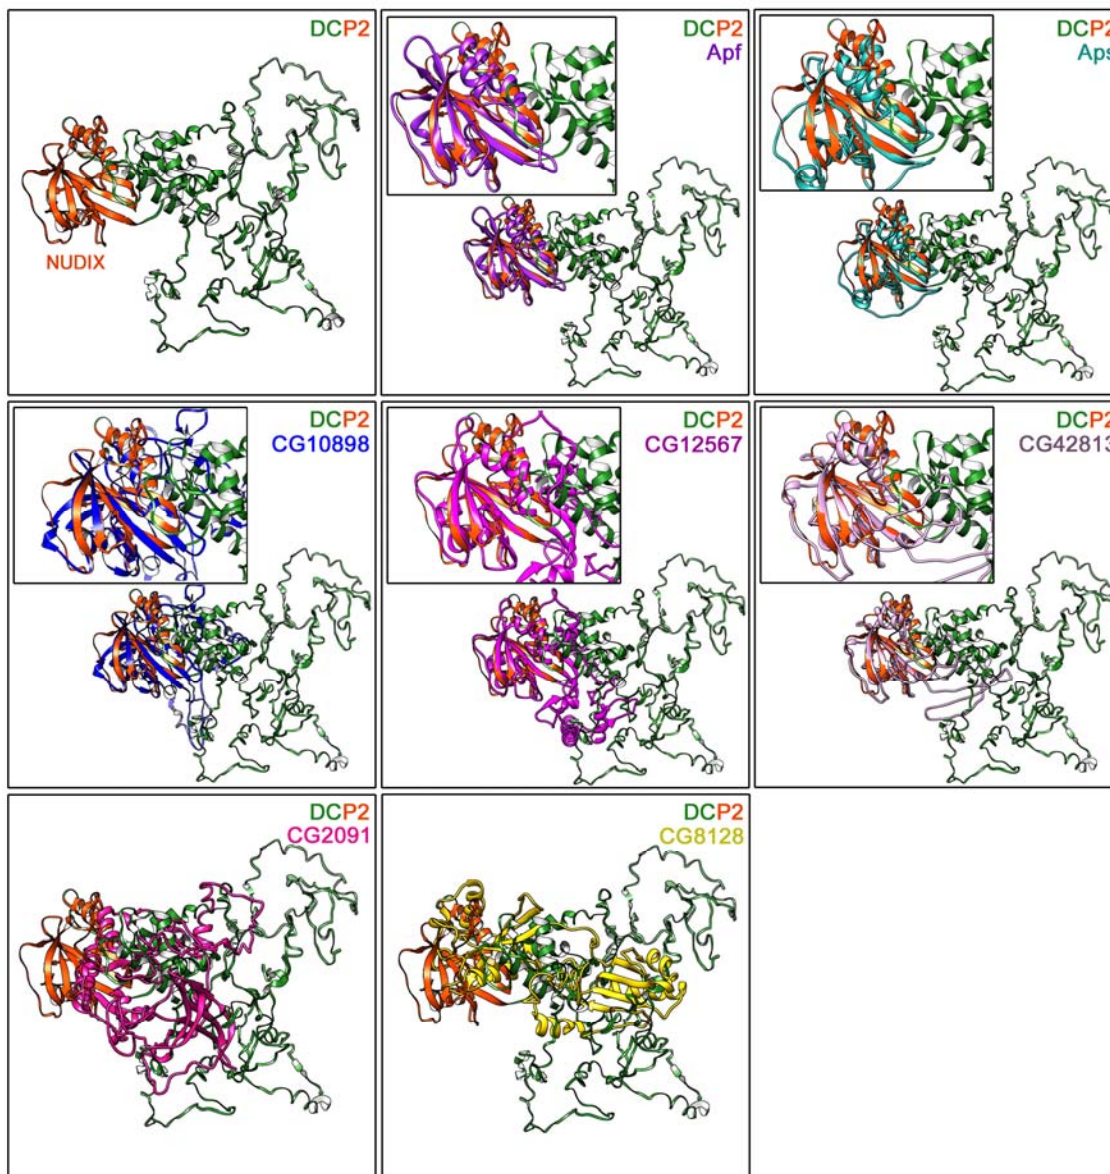

450

451 **Figure 11: The topology of the NUDIX motif is conserved beyond sequence dissimilarity.** The  
452 structure of DCP2 is represented in the first model, wherein the **NUDIX** motif is painted in **orange**, and  
453 the remaining chain in **green**. For each of the other models, the structural overlap of the NUDIX motif of  
454 the protein with that of the DCP2 NUDIX motif is shown in the inset. Notably, the tertiary structure of the  
455 NUDIX motif of almost all the proteins is similar to that of DCP2, despite dissimilarity in the linear  
456 sequence. NUDIX motifs of CG2091 (DCPS) and CG8128 do not overlap with each other or with that of  
457 any other NUDIX protein.

458

**Table 1: Table showing the sizes of the different regions of the DCP2 orthologs across the phylogenetic tree.** The NUDIX domain is conserved in length and sequence and almost always starts with Valine (V), except for *Saccharomyces cerevisiae* and *Schizosaccharomyces pombe*, which start with Isoleucine (I). The terminal residue is variable however, but is conserved in the vertebrates. The Box A domain does not vary appreciably in length, except for *Drosophila melanogaster* which is 95 residues long. The C-terminal residue however, is Tyrosine (Y) across the species, and is conserved. The Box A domain is followed by the spacer sequence towards the C-terminal, which is three amino acids long and begins with Lysine (K). The lower members show variability in composition but the vertebrates show a constant conserved sequence of Lysine(K)–Methionine(M)–Serine(S). Notably, the vertebrate orthologs are shorter in length as compared to the lower members, and show a higher degree of conservation, both in composition and location of sequence and in size.

| Schematic Representation of a typical mRNA decapping protein (DCP2) |                |                      |                      |                     |                   |                      |          |                      |                     |                   |                      |
|---------------------------------------------------------------------|----------------|----------------------|----------------------|---------------------|-------------------|----------------------|----------|----------------------|---------------------|-------------------|----------------------|
| Species                                                             | Protein Length | N-terminal to Box A  | Box A                |                     |                   | Spacer sequence      |          | NUDIX Fold           |                     |                   | Till C-terminal      |
|                                                                     |                | Length (amino acids) | Length (amino acids) | Starting amino acid | Ending amino acid | Length (amino acids) | Sequence | Length (amino acids) | Starting amino acid | Ending amino acid | Length (amino acids) |
| <i>D. discoideum</i>                                                | 620            | 171                  | 83                   | E                   | Y                 | 3                    | K-T-K    | 145                  | V                   | Y                 | 218                  |
| <i>S. cerevisiae</i>                                                | 969            | 16                   | 83                   | R                   | Y                 | 3                    | K-K-S    | 140                  | I                   | K                 | 727                  |
| <i>S. pombe</i>                                                     | 741            | 10                   | 82                   | V                   | Y                 | 3                    | K-T-R    | 145                  | I                   | N                 | 501                  |
| <i>C. elegans</i>                                                   | 786            | 151                  | 85                   | D                   | Y                 | 3                    | K-S-T    | 147                  | V                   | K                 | 400                  |
| <i>D. melanogaster</i>                                              | 791            | 211                  | 95                   | D                   | Y                 | 3                    | K-L-S    | 150                  | V                   | I                 | 332                  |
| <i>S. purpuratus</i>                                                | 454            | 10                   | 83                   | E                   | Y                 | 3                    | K-M-S    | 145                  | V                   | K                 | 213                  |
| <i>D. rerio</i>                                                     | 397            | 11                   | 82                   | L                   | Y                 | 3                    | K-M-G    | 150                  | V                   | S                 | 151                  |
| <i>X. tropicalis</i>                                                | 422            | 11                   | 82                   | V                   | Y                 | 3                    | K-M-G    | 150                  | V                   | S                 | 176                  |
| <i>G. gallus</i>                                                    | 416            | 11                   | 82                   | V                   | Y                 | 3                    | K-M-G    | 149                  | V                   | G                 | 171                  |
| <i>R. norvegicus</i>                                                | 421            | 11                   | 82                   | V                   | Y                 | 3                    | K-M-G    | 150                  | V                   | S                 | 175                  |
| <i>M. musculus</i>                                                  | 422            | 11                   | 82                   | V                   | Y                 | 3                    | K-M-G    | 150                  | V                   | S                 | 176                  |
| <i>H. sapiens</i>                                                   | 420            | 11                   | 82                   | V                   | Y                 | 3                    | K-M-G    | 150                  | V                   | S                 | 174                  |

**Table 2: Table showing the DCP2 orthologs in sibling species of *Drosophila melanogaster*.** The NUDIX domain is highly conserved with constant length and sequence whereas the Box A domain varies in size but almost always starts with Aspartic acid (D), except for *Drosophila persimilis* which starts with Glutamic acid (E), and ends with Tyrosine (Y). The Box A domain is followed by the spacer sequence towards the C-terminal, which is three amino acids long and begins with Lysine (K) and ends with Serine (S). Notably, *D. persimilis* has the shortest protein, with only 570 residues and has the shortest Box A domain as well while *D. grimshawi* has the longest protein with 926 residues, but the signature domains conform to the sizes observed in others. *D. willistoni* on the other hand, has the most number of residues composing the Box A domain.

| Schematic Representation of a typical mRNA decapping protein (DCP2) |                |                      |                      |                     |                   |                      |          |                      |                     |                   |                      |
|---------------------------------------------------------------------|----------------|----------------------|----------------------|---------------------|-------------------|----------------------|----------|----------------------|---------------------|-------------------|----------------------|
| <i>Drosophila</i> sp.                                               | Protein Length | N-terminal to Box A  | Box A                |                     |                   | Spacer sequence      |          | NUDIX Fold           |                     |                   | Till C-terminal      |
|                                                                     |                | Length (amino acids) | Length (amino acids) | Starting amino acid | Ending amino acid | Length (amino acids) | Sequence | Length (amino acids) | Starting amino acid | Ending amino acid | Length (amino acids) |
| <i>D. ananassae</i>                                                 | 768            | 194                  | 98                   | D                   | Y                 | 3                    | K-M-S    | 150                  | V                   | I                 | 323                  |
| <i>D. erecta</i>                                                    | 791            | 218                  | 95                   | D                   | Y                 | 3                    | K-L-S    | 150                  | V                   | I                 | 325                  |
| <i>D. grimshawi</i>                                                 | 926            | 257                  | 96                   | D                   | Y                 | 3                    | K-L-S    | 150                  | V                   | I                 | 420                  |
| <i>D. melanogaster</i>                                              | 791            | 211                  | 95                   | D                   | Y                 | 3                    | K-L-S    | 150                  | V                   | I                 | 332                  |
| <i>D. mojavensis</i>                                                | 859            | 264                  | 93                   | D                   | Y                 | 3                    | K-L-S    | 150                  | V                   | I                 | 349                  |
| <i>D. persimilis</i>                                                | 570            | 1                    | 77                   | E                   | Y                 | 3                    | K-M-S    | 150                  | V                   | I                 | 339                  |
| <i>D. pseudoobscura</i>                                             | 817            | 222                  | 94                   | D                   | Y                 | 3                    | K-M-S    | 150                  | V                   | I                 | 348                  |
| <i>D. sechellia</i>                                                 | 791            | 215                  | 95                   | D                   | Y                 | 3                    | K-L-S    | 150                  | V                   | I                 | 328                  |
| <i>D. simulans</i>                                                  | 794            | 214                  | 95                   | D                   | Y                 | 3                    | K-L-S    | 150                  | V                   | I                 | 332                  |
| <i>D. virilis</i>                                                   | 907            | 268                  | 93                   | D                   | Y                 | 3                    | K-L-S    | 150                  | V                   | I                 | 393                  |
| <i>D. willistoni</i>                                                | 894            | 257                  | 115                  | D                   | Y                 | 3                    | K-L-S    | 150                  | V                   | I                 | 369                  |
| <i>D. yakuba</i>                                                    | 801            | 220                  | 95                   | D                   | Y                 | 3                    | K-L-S    | 150                  | V                   | I                 | 333                  |

**Table 3: Table showing the NUDIX proteins in *Drosophila melanogaster*.** Besides DCP2, twelve (12) NUDIX proteins were identified in the homology search, out of which eight (8; including DCP2) had their NUDIX sequence annotated. Some of their features are enlisted below.

| CG Identifier (FlyBase) | Name | Function                                                                                 | Size (amino acids) | NUDIX                        |                     |                   | Other domain Length (amino acids) | Cellular location  |
|-------------------------|------|------------------------------------------------------------------------------------------|--------------------|------------------------------|---------------------|-------------------|-----------------------------------|--------------------|
|                         |      |                                                                                          |                    | Length (amino acids)         | Starting amino acid | Ending amino acid |                                   |                    |
| CG6169                  | DCP2 | m <sup>7</sup> G(5')pppN diphosphatase; Mn <sup>2+</sup> binding; RNA binding            | 791                | 150                          | Val (310)           | Ile (459)         | Box A (95) (202-306)              | Cytoplasm          |
| CG2091                  | Dcps | m <sup>7</sup> G(5')pppN diphosphatase; RNA 7-methylguanosine cap binding                | 374                | 109                          | Asp (16)            | Ser (124)         | -                                 | Nucleus; Cytoplasm |
| CG31713                 | Apf  | Bis(5'-nucleosyl)-tetrphosphatase (asymmetrical) (3.6.1.17)                              | 142                | 113                          | Ala (4)             | Lys (116)         | -                                 | -                  |
| CG6391                  | Aps  | Endopolyphosphatase (3.6.1.10); Diphosphoinositol-polyphosphate diphosphatase (3.6.1.52) | 177                | 119                          | Arg (18)            | Gln (136)         | -                                 | -                  |
| CG8128                  | -    | ADP-ribose diphosphatase (3.6.1.13); Nucleotide diphosphatase (3.6.1.9); NAD binding     | 330                | 122                          | Gly (163)           | Val (284)         | Pre-NUDIX (80) (67-146)           | -                  |
| CG12567                 | -    | 8-oxo-dGDP phosphatase                                                                   | 349                | 105                          | Ile (154)           | Cys (258)         | DUF4743 (123) (14-136)            | -                  |
| CG42813                 | -    | UDP-sugar diphosphatase (3.6.1.45)                                                       | 212                | 145                          | Val (40)            | Gln (184)         | -                                 | -                  |
| CG10898                 | -    | Hydrolase                                                                                | 340                | 101                          | Val (61)            | Arg (161)         | -                                 | -                  |
| CG10194                 | -    | Hydrolase                                                                                | 351                | NUDIX sequence not annotated |                     |                   | -                                 | -                  |
| CG10195                 | -    | Hydrolase                                                                                | 361                |                              |                     |                   | -                                 | -                  |
| CG11095                 | -    | Hydrolase                                                                                | 283                |                              |                     |                   | -                                 | -                  |
| CG18094                 | -    | Hydrolase                                                                                | 360                |                              |                     |                   | -                                 | -                  |
| CG42814                 | -    | UDP-sugar diphosphatase (3.6.1.45)                                                       | 237                |                              |                     |                   | -                                 | -                  |
